# Supplementary material
Source: Royal Society of Chemistry journal article supplement (doi:10.1039/d5nj04787k)

# “Supporting Information”

## **Metal decorated carbon-doped BN fullerenes as highly efficient materials to solid-state hydrogen storage: Insights from DFT calculations**

Qamar Abuhassan <sup>1,\*</sup>, Luma Hussain Saleh <sup>2</sup>, G. Padma Priya <sup>3</sup>, Subhashree Ray <sup>4</sup>, Amrita Pal <sup>5</sup>,  
Renu Sharma <sup>6</sup>, Arofat Inkhonova <sup>7</sup>, Azam Zoyidov <sup>8</sup>, Saodatkhon Ibragimova <sup>9,10</sup>,  
Varagunapandiyan Natarajan <sup>11</sup>, Saiful Islam <sup>12</sup>

**Figure S1.** Optimized geometries of different C-doped BN nanostructures considered in the present study

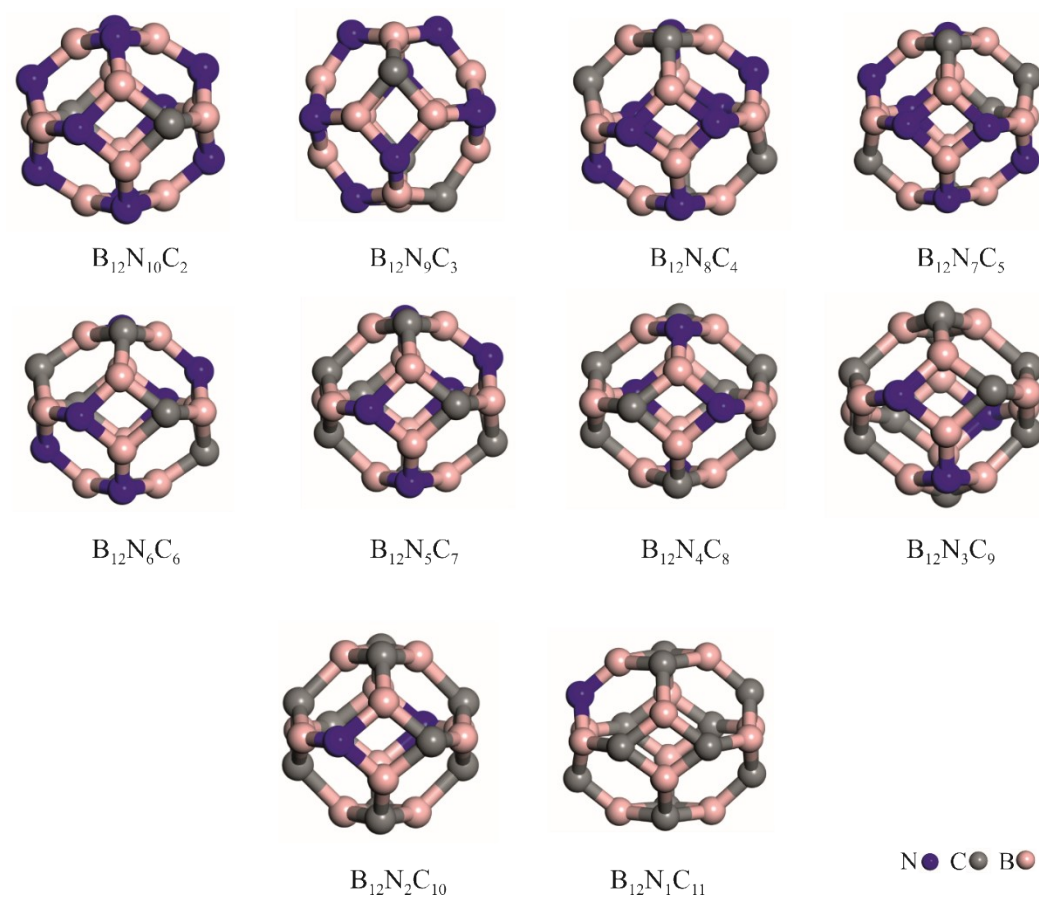

**Figure S2.** Optimized geometry and adsorption energy of a Li (left) or Sc atom (right) adsorbed on the pure  $B_{12}N_{12}$  nanocage

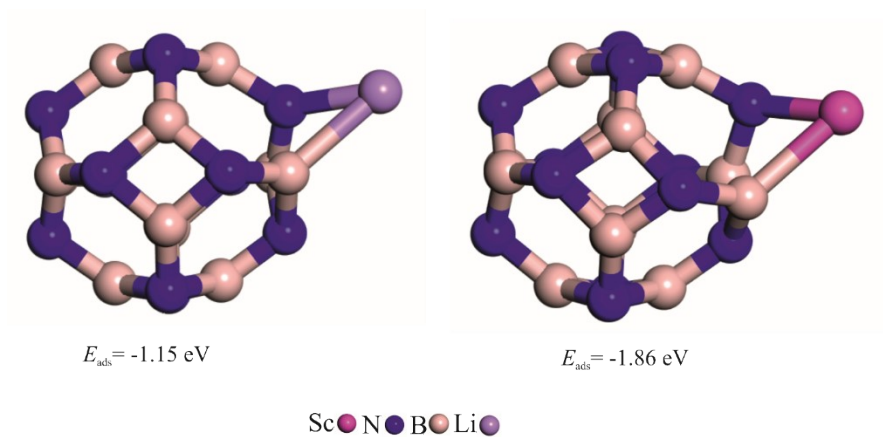

**Figure S3.** Optimized geometry and adsorption energy of a Li or Sc atom adsorbed on the tetragon ring of  $B_{12}N_{11}C$  and  $B_{12}C_{12}$  nanocages: (a)  $Li@B_{12}N_{11}C$ , (b)  $Sc@B_{12}N_{11}C$ , (c)  $Li@B_{12}C_{12}$ , and (d)  $Sc@B_{12}C_{12}$ .

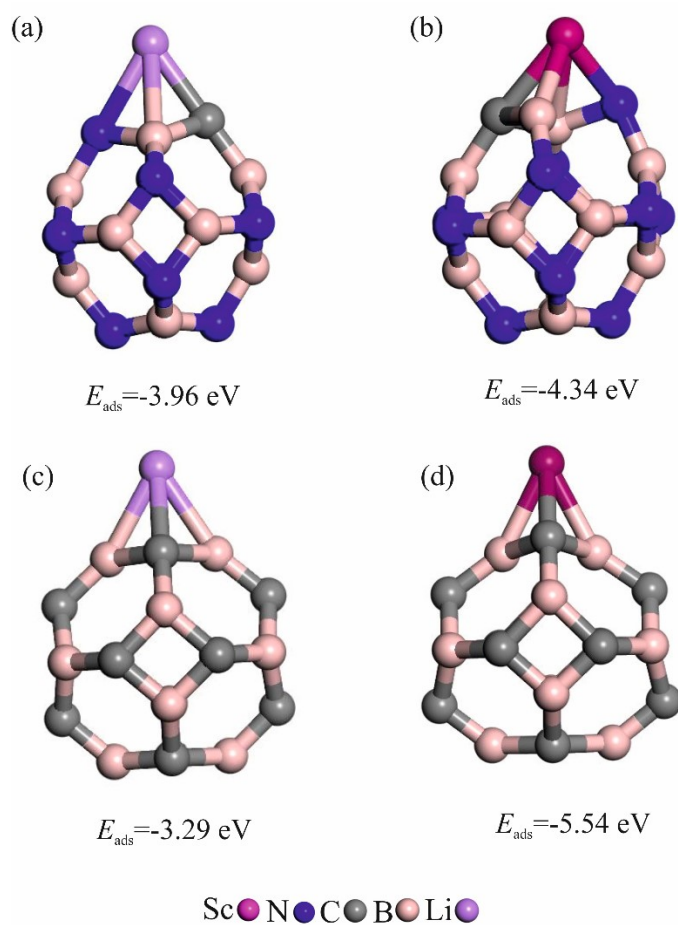

**Figure S4.** Evolution of the number of adsorbed H<sub>2</sub> molecules as a function of simulation time: (a) 24H<sub>2</sub>/Li<sub>8</sub>@B<sub>12</sub>C<sub>12</sub> and (b) 16H<sub>2</sub>/Sc<sub>4</sub>@B<sub>12</sub>C<sub>12</sub>

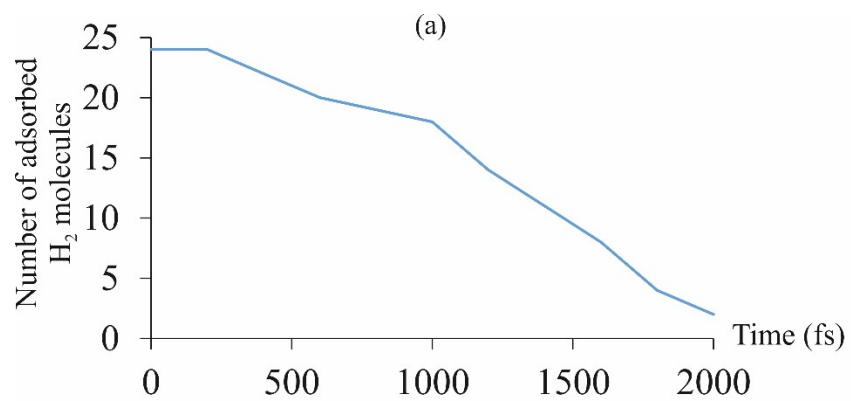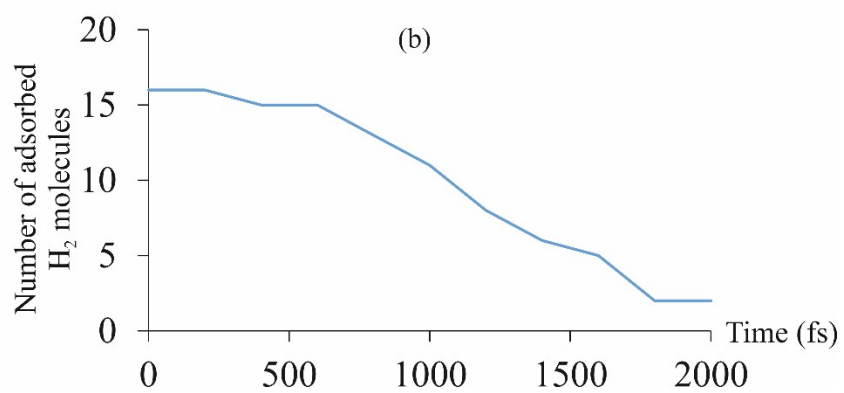

Supplement: d5nj04787k1.pdf [file d5nj04787k1.pdf]
